# Supplementary material for: Functional Characterization of the Wheat Macrophage Migration Inhibitory Factor TaMIF1 in Wheat-Stripe Rust (Puccinia striiformis) Interaction
Source: MDPI journal article supplement (doi:10.3390/biology10090878), 2021-09-07
Supplement: s1 [file s1]

Supplementary figures and tables

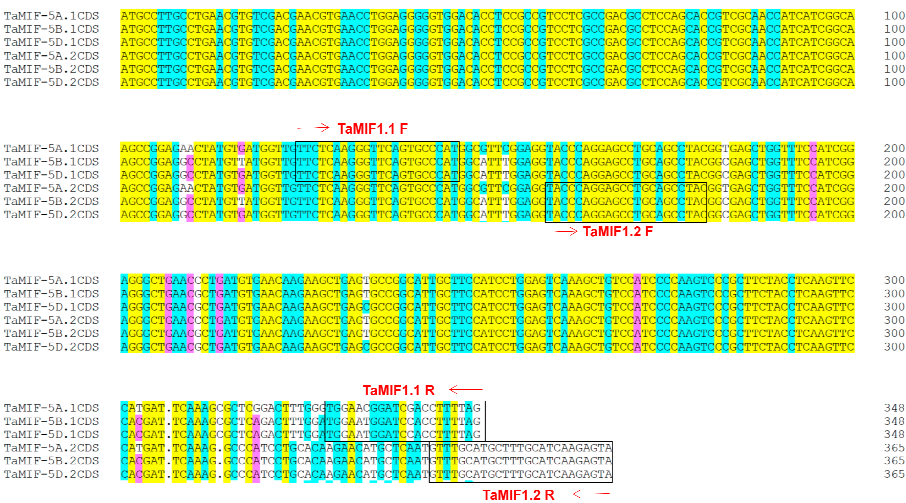

**Figure S1. Sequence alignment of TaMIF coding sequences (cds) on chromosome 5 with two transcripts.** Sequences generating identical nucleotide sequences are colored in yellow, those yielding highly similar (>75%) sequences are shown in blue, and those yielding similar (>50%) residues are shown in green. The primers used for RT-qPCR are indicated in red boxes.

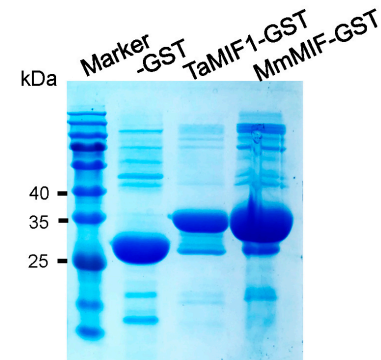

**Figure S2. Pure proteins analysis through SDS-PAGE.**

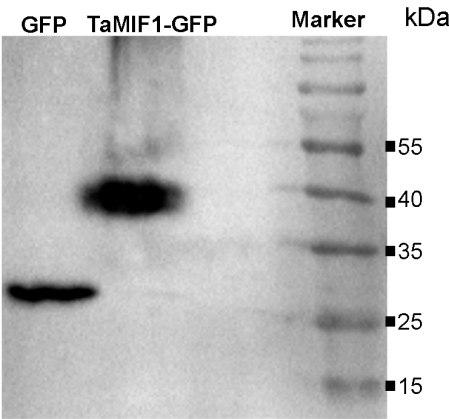

**Figure S3. The Western blot of GFP and the TaMIF1-GFP fusion protein with GFP antibodies.**

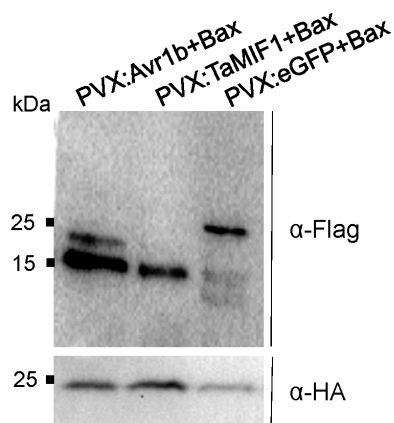

**Figure S4. Western blot analysis of protein expressions in *N. benthamiana*.** Avr1b, TaMIF1 and eGFP were detected with an Flag-antibody. Bax was detected with an HA-antibody.

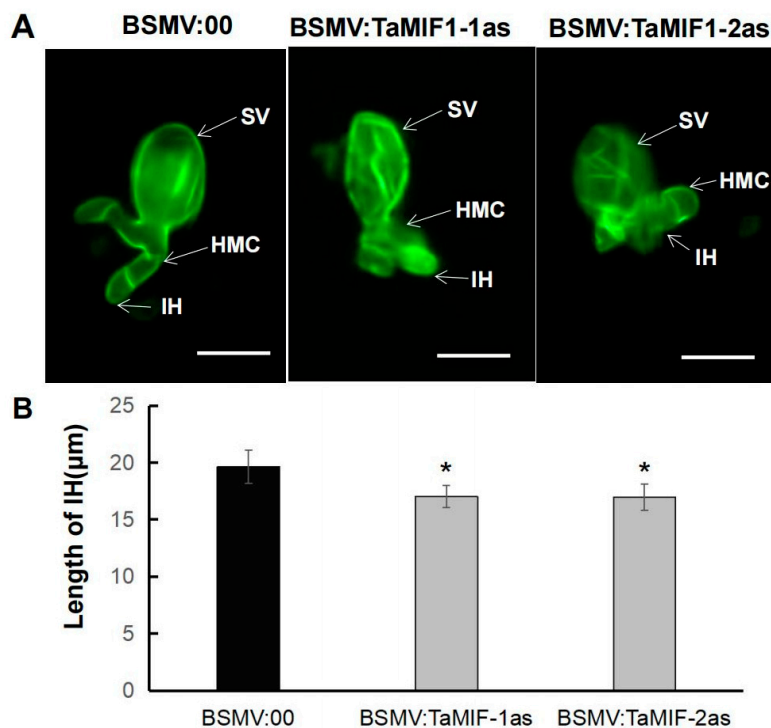

**Figure S5. Fungal growth of CYR31 in wheat leaves inoculated with BSMV:00 or BSMV:TaMIF1 at 24 hpi.** (A) After staining with wheatgerm agglutinin (WGA), fungal structure was examined under a fluorescence microscope. Bars=20  $\mu\text{m}$ . (B) Length of Infective hypha was measured using DP-BSW software. The statistical results were obtained from 50 infection sites and values represent mean $\pm$ SE of three independent replicates. Differences were assessed using Student's t-tests. Asterisks indicate  $P < 0.05$ . SV, substomatal vesicle; IH, infection hypha; HMC, haustorial mother cell.

**Table S1 Primers used in this study.**

| Primer name | Primer 5'-3'              | Purpose                                               |
|-------------|---------------------------|-------------------------------------------------------|
| TaEF-qRT-F  | TGGTGTCAATCAAGCCTGGTATGGT | The endogenous reference for normalization in qRT-PCR |

|                      |                                             |                                                             |
|----------------------|---------------------------------------------|-------------------------------------------------------------|
| TaEF-qRT-R           | ACTCATGGTGCATCTCAACGGACT                    | The endogenous reference for normalization in qRT-PCR       |
| TaMIF1.1-qRT-F       | TTCTCAAGGGTTCAGTGCCCAT                      | qRT-PCR for the expression patterns of TaMIF1.1             |
| TaMIF1.1-qRT-R       | CTAAAAGGTGGATCCATTCCA                       | qRT-PCR for the expression patterns of TaMIF1.1             |
| TaMIF1.2-qRT-F       | TACCCAGGAGCCTGCAGCCTAC                      | qRT-PCR for the expression patterns of TaMIF1.2             |
| TaMIF1.2-qRT-R       | TACTCTTGATGCAAAGCATGCAAAC                   | qRT-PCR for the expression patterns of TaMIF1.2             |
| TaMIF1-PTF-F         | ACGCGTCGACATGCCTTGCCTGAACGTGTC              | Clone TaMIF1 to pTF486 for subcellular localization         |
| TaMIF1-PTF-R         | CATGGGATCCAAAGGTGGATCCATTCCATCC             | Clone TaMIF1 to pTF486 for subcellular localization         |
| TaMIF1-4T-F          | CCGCGTGGATCCCCGGAATTCATGCCTTGCCTGAACGTGTC   | Clone TaMIF1 to pGex-4T for prokaryotic expression          |
| TaMIF1-4T-R          | ATGCGGCCGCTCGAGTCGACCCTAAAAGGTGATCCATTCCATC | Clone TaMIF1 to pGex-4T for prokaryotic expression          |
| MmMIF-4T-F           | CCGCGTGGATCCCCGGAATTCATGCCTATGTTATCGTGAAC   | Clone MmMIF to pGex-4T for prokaryotic expression           |
| MmMIF-4T-R           | ATGCGGCCGCTCGAGTCGACCTCAAGCGAAGGTGGAACC     | Clone MmMIF to pGex-4T for prokaryotic expression           |
| TaMIF1-PVX-F         | GGAATTCCATATGATGCCTTGCCTGAACGTGT            | Clone TaMIF1 to PREP-3X for yeast overexpression            |
| TaMIF1-PVX-R         | CCGGAATTCCTAAAAGGTGGATCCATTCCAT             | Clone TaMIF1 to PREP-3X for yeast overexpression            |
| TaMIF1-PVX-F         | GTACCCGGGATGCCTTGCCTGAACGTGT                | Clone TaMIF1 to PVX for expression in <i>N. benthamiana</i> |
| TaMIF1-PVX-R         | CATGTCGACCTAAAAGGTGGATCCATTCCAT             | Clone TaMIF1 to PVX for expression in <i>N. benthamiana</i> |
| eGFP-PVX-F:          | GTACCCGGGATGGTGAGCAAGGGCGA                  | Clone eGFP to PVX for expression in <i>N. benthamiana</i>   |
| eGFP-PVX-R:          | CATGTCGACTTACTTGTACAGCTCGTCCATG             | Clone eGFP to PVX for expression in <i>N. benthamiana</i>   |
| Avr1b-PVX-F:         | GTACCCGGGATGCGTCTATCTTTTGTGCTT              | Clone Avr1b to PVX for expression in <i>N. benthamiana</i>  |
| Avr1b-PVX-R          | CATGTCGACCAGCTCTGATACAGGTGAAAG              | Clone Avr1b to PVX for expression in <i>N. benthamiana</i>  |
| BAX-PVX-F            | GTACCCGGGATGGACGGGTCCGGGGA                  | Clone BAX to PVX for expression in <i>N. benthamiana</i>    |
| BAX-PVX-R            | ATAAGAATGCGGCCGCGCCCATCTTCTTCCA<br>GATGGTG  | Clone BAX to PVX for expression in <i>N. benthamiana</i>    |
| TaMIF1- $\gamma$ -F1 | CCTTAATTAAGGGGAGGGGAGAAGAAG                 | Clone TaMIF1-1as to the $\gamma$ vector for VIGS            |
| TaMIF1- $\gamma$ -R1 | ATAAGAATGCGGCCGCTCCAGGTTACGTTC<br>GTC       | Clone TaMIF1-1as to the $\gamma$ vector for VIGS            |
| TaMIF1- $\gamma$ -F2 | CCTTAATTAATTCTACCTCAAGTTCACG                | Clone TaMIF1-2as to the $\gamma$ vector for VIGS            |
| TaMIF1- $\gamma$ -R2 | ATAAGAATGCGGCCGCATATGATGCGTCTAA<br>AAGGT    | Clone TaMIF1-2as to the $\gamma$ vector for VIGS            |

**Table S2 RNAi targets predicted of TaMIF1-1as and TaMIF1-2as.** The nucleic acid sequences of TaMIF1-1as and TaMIF1-2as were used for prediction with the RNAi off-target prediction tool

SI-FI 3.2 in both the genome of wheat and *Pst*. All predicted targets were listed, and they were all from wheat encoding TaMIF1.

|                     | <b><i>Ta</i>MIF1-1as</b> | <b><i>Ta</i>MIF1-2as</b> |
|---------------------|--------------------------|--------------------------|
| <b>RNAi targets</b> | 5DL_AA1450270.1          | 5AL_AA1155140.1          |
|                     | 5BL_AA1337600.1          | 5BL_AA1337600.1          |
|                     | 5AL_AA1155140.1          | 5DL_AA1450270.1          |
